# Supplementary material for: Sulforaphane, a Dietary Isothiocyanate, Induces G2/M Arrest in Cervical Cancer Cells through CyclinB1 Downregulation and GADD45β/CDC2 Association
Source: PubMed Central journal article supplement (PMC5037805; doi:10.3390/ijms17091530), 2016-09-12
Supplement: ijms-17-01530-s001.pdf [file ijms-17-01530-s001.pdf]

# Supplementary Materials: Sulforaphane, a Dietary Isothiocyanate, Induces G<sub>2</sub>/M Arrest in Cervical Cancer Cells through CyclinB1 Downregulation and GADD45 $\beta$ /CDC2 Association

Ya-Min Cheng, Ching-Chou Tsai and Yi-Chiang Hsu

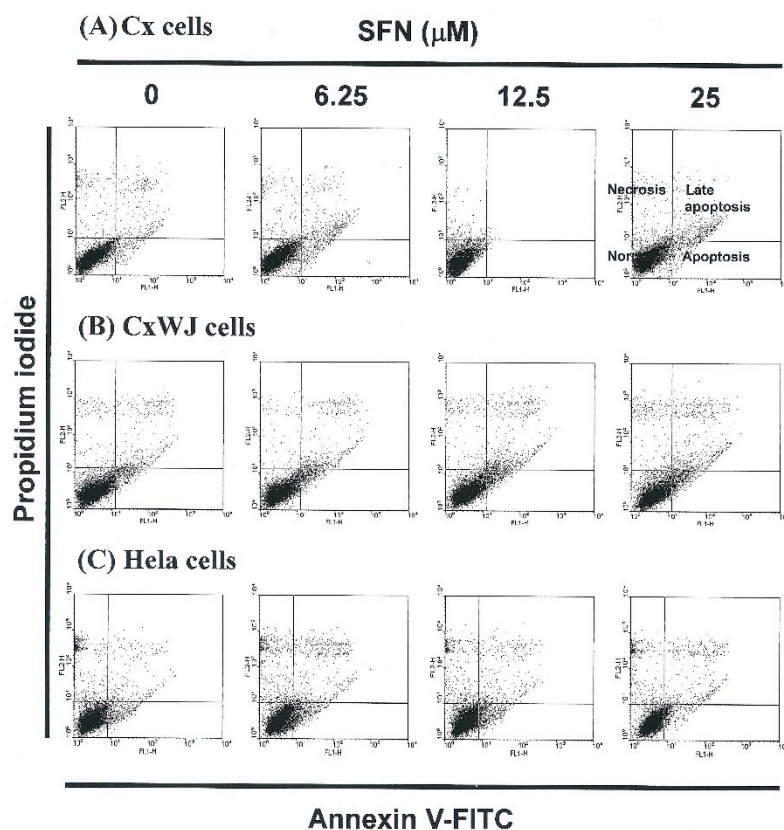

**Figure S1.** Influence of SFN on apoptosis/necrosis in cervical cancer cell lines (A) Cx, (B) CxWJ and (C) HeLa. Total apoptosis and necrosis in cervical cancer cell lines after 4 hours of incubation with SFN.

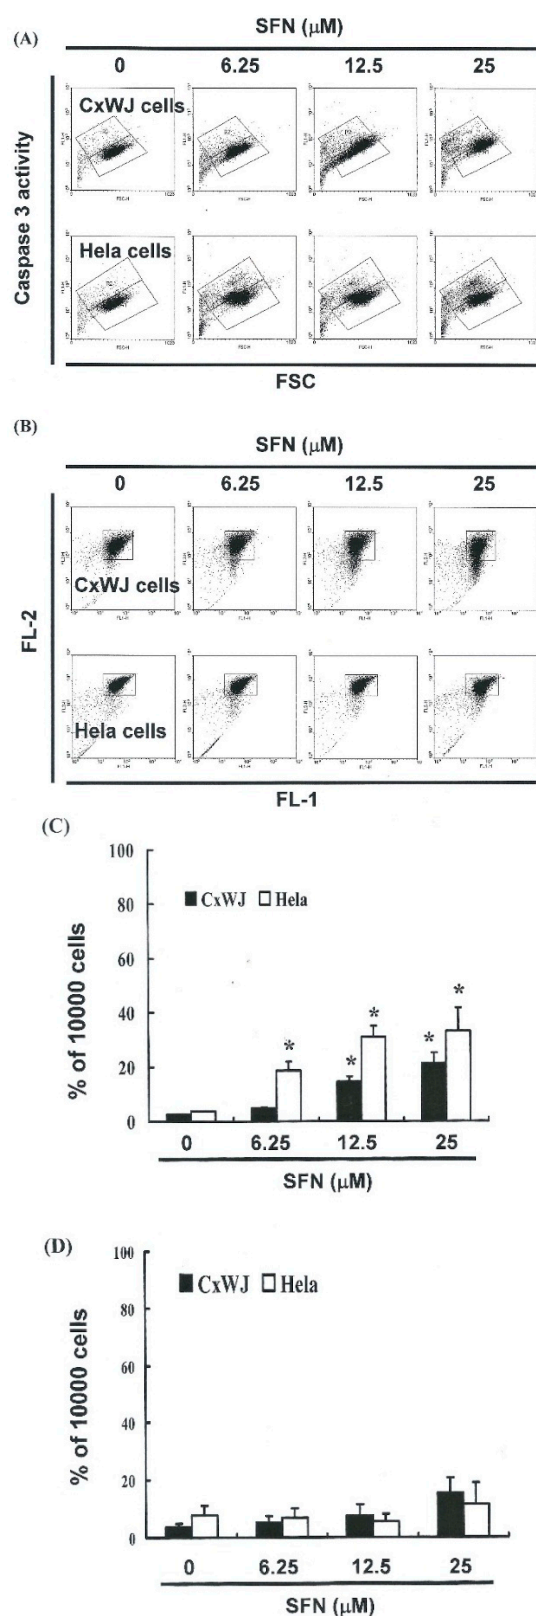

**Figure S2.** (A) Caspase-3 activity and (B) JC-1 in cervical cancer cell lines following 24 h of SFN treatment (0, 6.25, 12.5, and 25  $\mu\text{M}$ ). Following treatment, cells were harvested and labeled using FITC rabbit anti-active caspase-3 or JC-1. Activation was quantified using flow cytometry; (C) Quantification of caspase-3 activity and (D) quantification of JC-1. All data is reported as the mean ( $\pm$ SEM) of at least three separate experiments. Statistical analysis was performed using a *t*-test, with differences considered significant at a level of \*  $p < 0.05$  versus the 0  $\mu\text{M}$  control group.

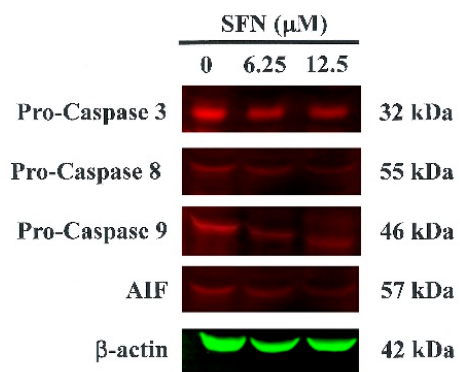

**Figure S3.** Influence of SFN on the expression of caspase-3, caspase-8, caspase-9 and AIF proteins in HeLa cells. Cells were treated with SFN (0, 6.25 and 12.5  $\mu$ M) for 24 h, and proteins were subsequently detected by western blotting representative blot from 3 independent experiments.
